# Supplementary material
Source: Springer Nature journal article supplement (http://www.springermedizin.de/resource/supplementary/12967_2013_1689_MOESM6_ESM.pdf/9574652)
Supplement: MOESM6 [file 9574652]

# UST Summary

Sample (plasma, other bodily fluids) collection

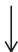

miRNA purification

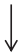

Measurement of miRNA concentrations

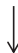

Calculation of miRNA ratios and data analysis with specially developed software

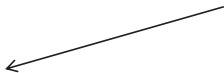

Detection of organ system/organ pathology

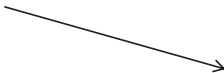

Detection of pathology type

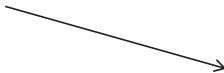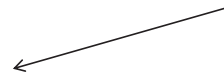

Further diagnostic tests for specific diseases
